# Supplementary material for: A polymeric membrane electrode for the detection of perchlorate in water at the sub-micro-molar level
Source: Royal Society of Chemistry journal article supplement (doi:10.1039/c3ay40522b), 2013-01-01
Supplement: c3ay40522b.pdf [file c3ay40522b.pdf]

## Supporting Information

### A Polymeric Membrane Electrode for the Detection of Perchlorate in Water at the Sub-micro-molar Level

Po-Yen Wang<sup>1</sup>, S. Ismat Shah<sup>2,3</sup>, and Chin-Pao Huang<sup>1\*</sup>

**1:** Department of Civil and Environmental Engineering, University of Delaware,  
Newark, DE 19716, USA

**2:** Department of Material Sciences and Engineering, University of Delaware,  
Newark, DE 19716, USA

**3:** Department of Physics and Astrophysics, University of Delaware, Newark, DE  
19716, USA

**\*:** Corresponding author: Tel: (302) 831-8428; Fax: (302) 831-8428, E mail:  
[huang@udel.edu](mailto:huang@udel.edu)

#### *S1. Internal solution*

Two types of internal solutions were tested, (1) perchlorate solution and (2) Ni(DBM)<sub>2</sub> + perchlorate, to optimize the sensitivity of perchlorate-ISE. Results (Fig S1 and Table S1) showed that 10<sup>-4</sup> M of internal solution without addition of Ni(II) complexes was adequate in attaining Nernstian slope response and sensitivity.

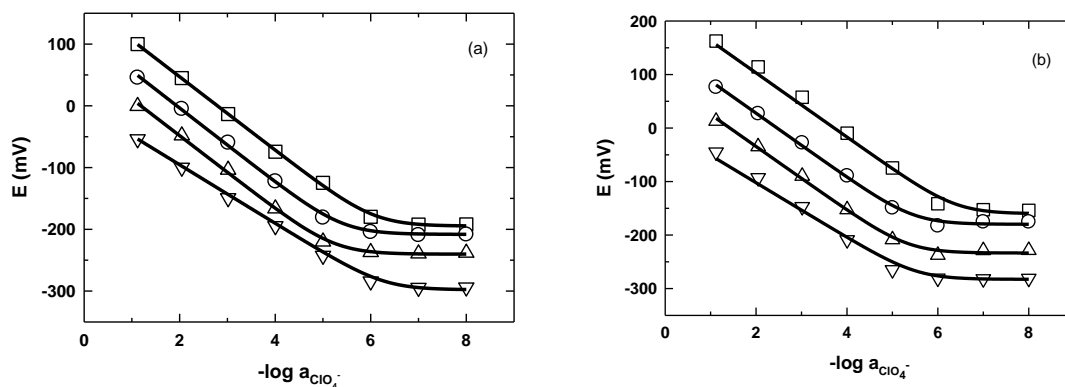

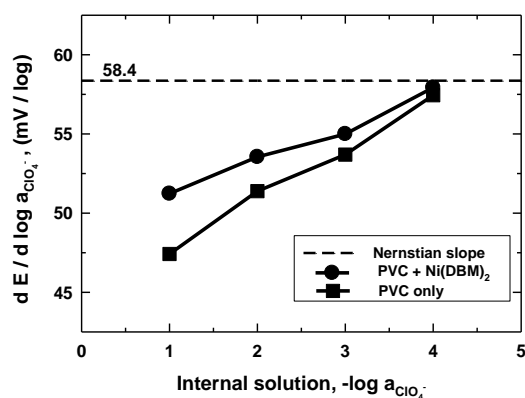

Fig. S1: Effect of internal perchlorate concentration on the potentiometric response of (a) PVC, (b) PVC+Ni(DBM)<sub>2</sub> electrode and (c) changes of Nernstian slope.

Experimental conditions: temperature = 21 ~ 23 °C; pH = 5 ~7. Symbols: (□) 0.1 mM, (○) 1.0 mM, (△) 10 mM, (▽) 100 mM. The dashed line represents the theoretical Nernstian slope of 58.4 mV/log.

## S2. Thickness of ISE membrane

The electrode potential decreased with perchlorate activity (log) in the perchlorate activity range of  $10^{-6}$  to  $10^{-1}$  M (Fig. S3, Supporting Information). The membrane resistance will increase with thickness which consequently will decrease the ion flux across the membrane.

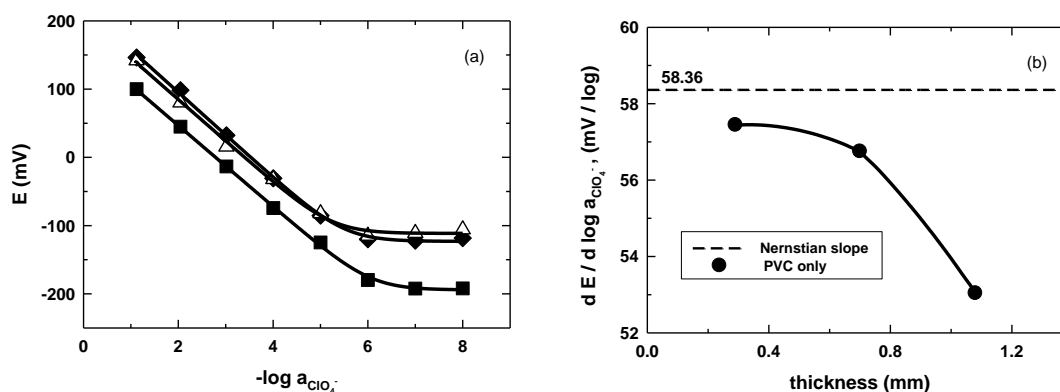

Fig. S2: Effect membrane thickness on the (a) potentiometric response and (b) Nernstian slope of PVC-only electrodes. Experimental conditions: temperature = 21~23 °C; pH = 6 ~7. Thickness: (■) 0.29 mm; (◆) 0.70 mm and (△) 1.08 (mm).

### S3. Perchlorate adsorption by various membranes

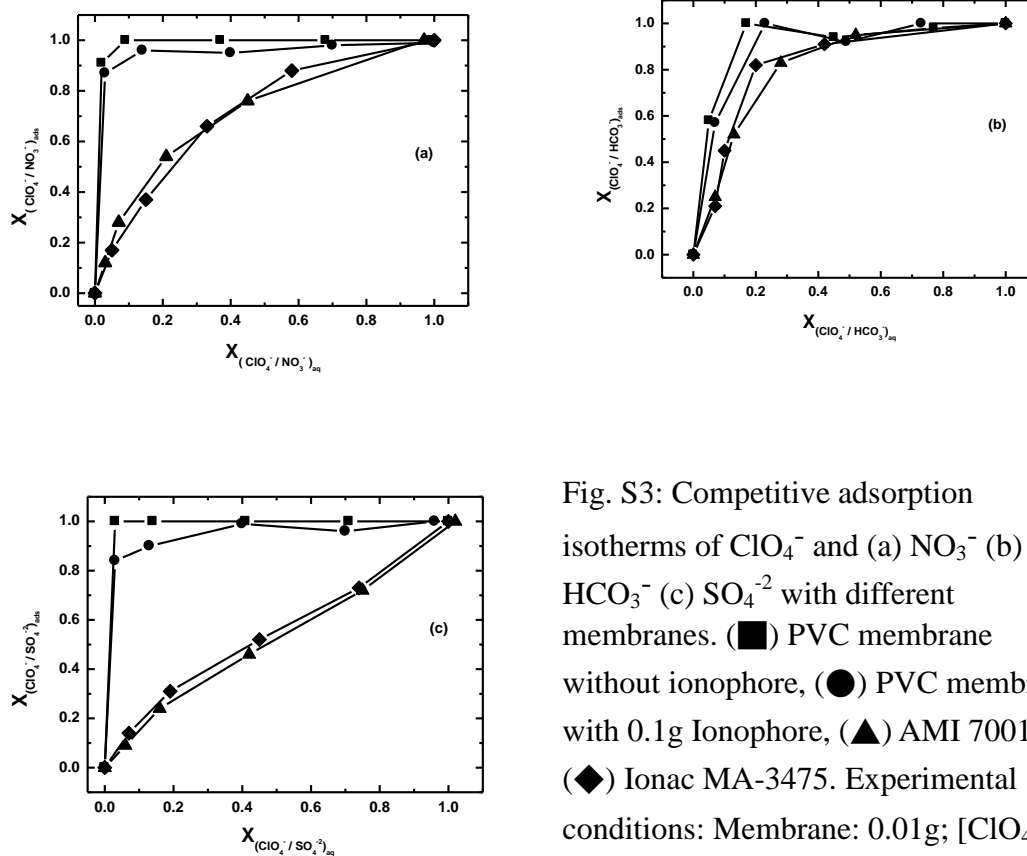

Fig. S3: Competitive adsorption isotherms of  $\text{ClO}_4^-$  and (a)  $\text{NO}_3^-$  (b)  $\text{HCO}_3^-$  (c)  $\text{SO}_4^{2-}$  with different membranes. (■) PVC membrane without ionophore, (●) PVC membrane with 0.1g Ionophore, (▲) AMI 7001S, (◆) Ionac MA-3475. Experimental conditions: Membrane: 0.01g;  $[\text{ClO}_4^-]$ : 0 to 10 ppm;  $[\text{NO}_3^-]$ ,  $[\text{HCO}_3^-]$  and  $[\text{SO}_4^{2-}]$ : 0 to 10 ppm; pH = 5 ~7.

Table S1. Effect of ionophore and presence of perchlorate in the internal solution on the performance of the PVC-only and the PVC+ionophore electrodes.

| Membrane                     | Internal solution                                                                   | Nernstian Slope (mV/log) | Linear range (M)                                 | R <sup>2</sup> |
|------------------------------|-------------------------------------------------------------------------------------|--------------------------|--------------------------------------------------|----------------|
| PVC <sup>a</sup>             | DIW                                                                                 | 60.6 ± 0.1               | 1.0 x 10 <sup>-6</sup> to 1.0 x 10 <sup>-1</sup> | 0.9971         |
| PVC <sup>a</sup>             | ClO <sub>4</sub> <sup>-</sup> (10 <sup>-4</sup> M)                                  | 58.5 ± 0.3               | 1.0 x 10 <sup>-6</sup> to 1.0 x 10 <sup>-1</sup> | 0.9964         |
| PVC <sup>a</sup>             | ClO <sub>4</sub> <sup>-</sup> (10 <sup>-4</sup> M) + ionophore (10 <sup>-5</sup> M) | 55.8 ± 0.4               | 1.0 x 10 <sup>-6</sup> to 1.0 x 10 <sup>-1</sup> | 0.9984         |
| PVC + ionophore <sup>b</sup> | ClO <sub>4</sub> <sup>-</sup> (10 <sup>-4</sup> M)                                  | 56.7 ± 0.2               | 1.0 x 10 <sup>-6</sup> to 1.0 x 10 <sup>-1</sup> | 0.9955         |
| PVC + ionophore <sup>b</sup> | ClO <sub>4</sub> <sup>-</sup> (10 <sup>-4</sup> M) + ionophore (10 <sup>-5</sup> M) | 52.2 ± 0.2               | 1.0 x 10 <sup>-6</sup> to 1.0 x 10 <sup>-1</sup> | 0.9949         |

a: PVC (wt%):51.55; DBP (wt%):44.67; MTOAC (wt%):3.78.

b: PVC (wt%):49.36; DBP (wt%):42.90; MTOAC (wt%):3.62 ; Ionophore (wt%):4.12, Ni(DBM)<sub>2</sub>.

Experimental conditions: Perchlorate concentration = 10<sup>-8</sup> to 0.1 M; Temperature = 21 ~ 23 °C; pH = 5 ~7; Reference electrode = SCE

| Table S2. Chemical composition of water samples studied |                 |                  |                  |                 |                |                  |                  |      |                               |                               |                 |                              |      |
|---------------------------------------------------------|-----------------|------------------|------------------|-----------------|----------------|------------------|------------------|------|-------------------------------|-------------------------------|-----------------|------------------------------|------|
|                                                         | Cations (meq/L) |                  |                  |                 |                |                  |                  |      | Anions (meq/L)                |                               |                 |                              |      |
| Samples                                                 | pH              | Ca <sup>2+</sup> | Mg <sup>2+</sup> | Na <sup>+</sup> | K <sup>+</sup> | Cu <sup>2+</sup> | Fe <sup>2+</sup> | Σ    | HCO <sub>3</sub> <sup>-</sup> | SO <sub>4</sub> <sup>2-</sup> | Cl <sup>-</sup> | NO <sub>3</sub> <sup>-</sup> | Σ    |
| Creek Water                                             | 6.60            | 2.74             | 1.05             | 4.11            | 0.06           | -                | -                | 7.96 | 2.92                          | 0.53                          | 4.50            | 0.07                         | 8.02 |
| Rain Water                                              | 5.88            | 0.03             | -                | 0.02            | -              | -                | -                | 0.05 | 0.09                          | 0.07                          | 0.08            | 0.05                         | 0.29 |
| Tap Water                                               | 6.27            | 2.28             | 1.16             | 0.78            | 0.07           | 0.03             | -                | 4.32 | 1.75                          | 0.84                          | 1.27            | 0.34                         | 4.20 |
